# Supplementary material for: Loss of Estrogen Receptors is Associated with Increased Tumor Aggression in Laryngeal Squamous Cell Carcinoma
Source: PubMed Central journal article supplement (PMC7060328; doi:10.1038/s41598-020-60675-2), 2020-03-06
Supplement: 41598_2020_60675_MOESM1_ESM.pdf [file 41598_2020_60675_MOESM1_ESM.pdf]

**Title:** Loss of Estrogen Receptors is Associated with Increased Tumor Aggression in Laryngeal Squamous Cell Carcinoma

**Authors:** Anjali Verma, B.S.<sup>1\*</sup>, Nofrat Schwartz, M.D.<sup>2,3,4\*</sup>, David J. Cohen, M.D.<sup>1</sup>, Vaidehi Patel, B.S.<sup>1,5</sup>, Benny Nageris, M.D.<sup>2,3</sup>, Gideon Bachar, M.D.<sup>3,6</sup>, Barbara D. Boyan, Ph.D.<sup>1,7\*</sup>, and Zvi Schwartz, D.M.D., Ph.D.<sup>1,8</sup>

**Affiliations:** <sup>1</sup>Department of Biomedical Engineering, Virginia Commonwealth University, Richmond, VA; <sup>2</sup>Department of Otolaryngology, Meir Hospital, Kfar Saba, Israel; <sup>3</sup>Sackler Faculty of Medicine, Tel Aviv University, Tel Aviv, Israel; <sup>4</sup>Department of Otolaryngology – Head and Neck Surgery and Neurosurgery, University of North Carolina School of Medicine, Chapel Hill, NC; <sup>5</sup>University of Pittsburgh School of Medicine, Pittsburgh, PA; <sup>6</sup>Department of Otolaryngology Head and Neck Surgery, Rabin Medical Center, Petah-Tikvah, Israel; <sup>7</sup>Department of Biomedical Engineering, Georgia Institute of Technology, Atlanta, GA; <sup>8</sup>Department of Periodontics, University of Texas Health Science Center at San Antonio, San Antonio, TX

\*These authors contributed equally to the publication of this manuscript

## Supplemental Figures

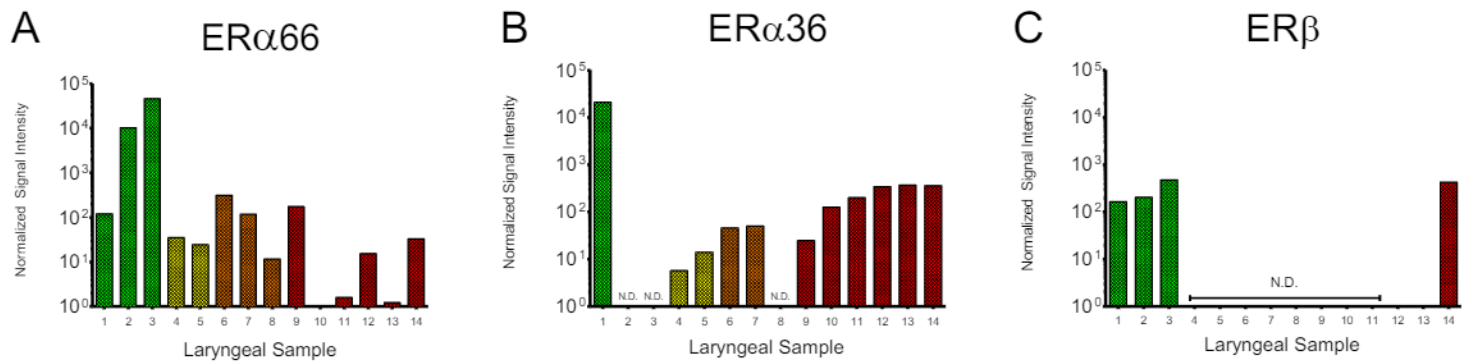

Supplemental Figure 1: Quantification of western blots for ER $\alpha$ 66 (A), ER $\alpha$ 36 (B), and ER $\beta$  (C) for individual clinical tumor samples. Y-axes are given as log scales. Samples are color-coded according to clinical stage. Stage 1 samples are green, stage 2 yellow, stage 3 orange, and stage 4 red. N.D. = no signal detected.

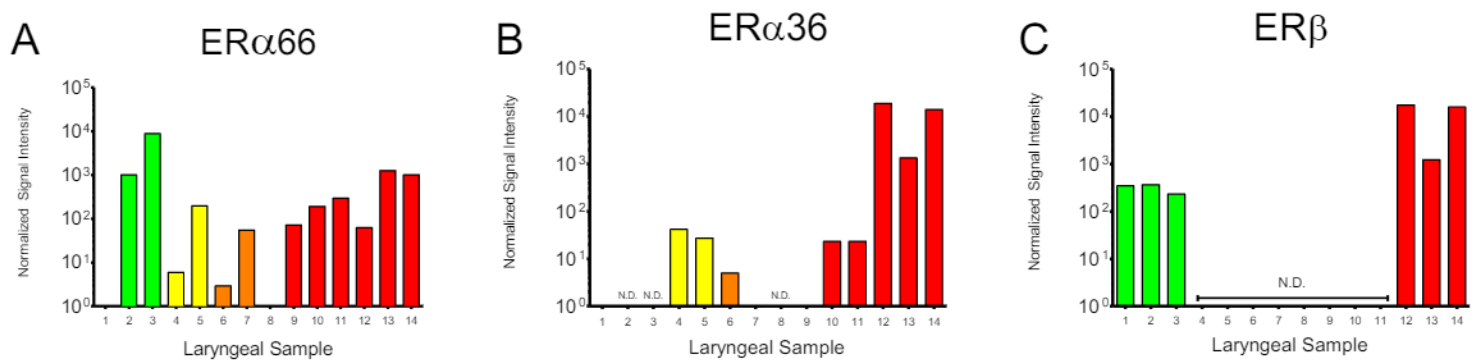

Supplemental Figure 2: Quantification of western blots for ER $\alpha$ 66 (A), ER $\alpha$ 36 (B), and ER $\beta$  (C) for normal epithelia adjacent to clinical tumor samples. Y-axes are given as log scales. Samples are color-coded according to clinical stage. Stage 1 samples are green, stage 2 yellow, stage 3 orange, and stage 4 red. N.D. = no signal detected.

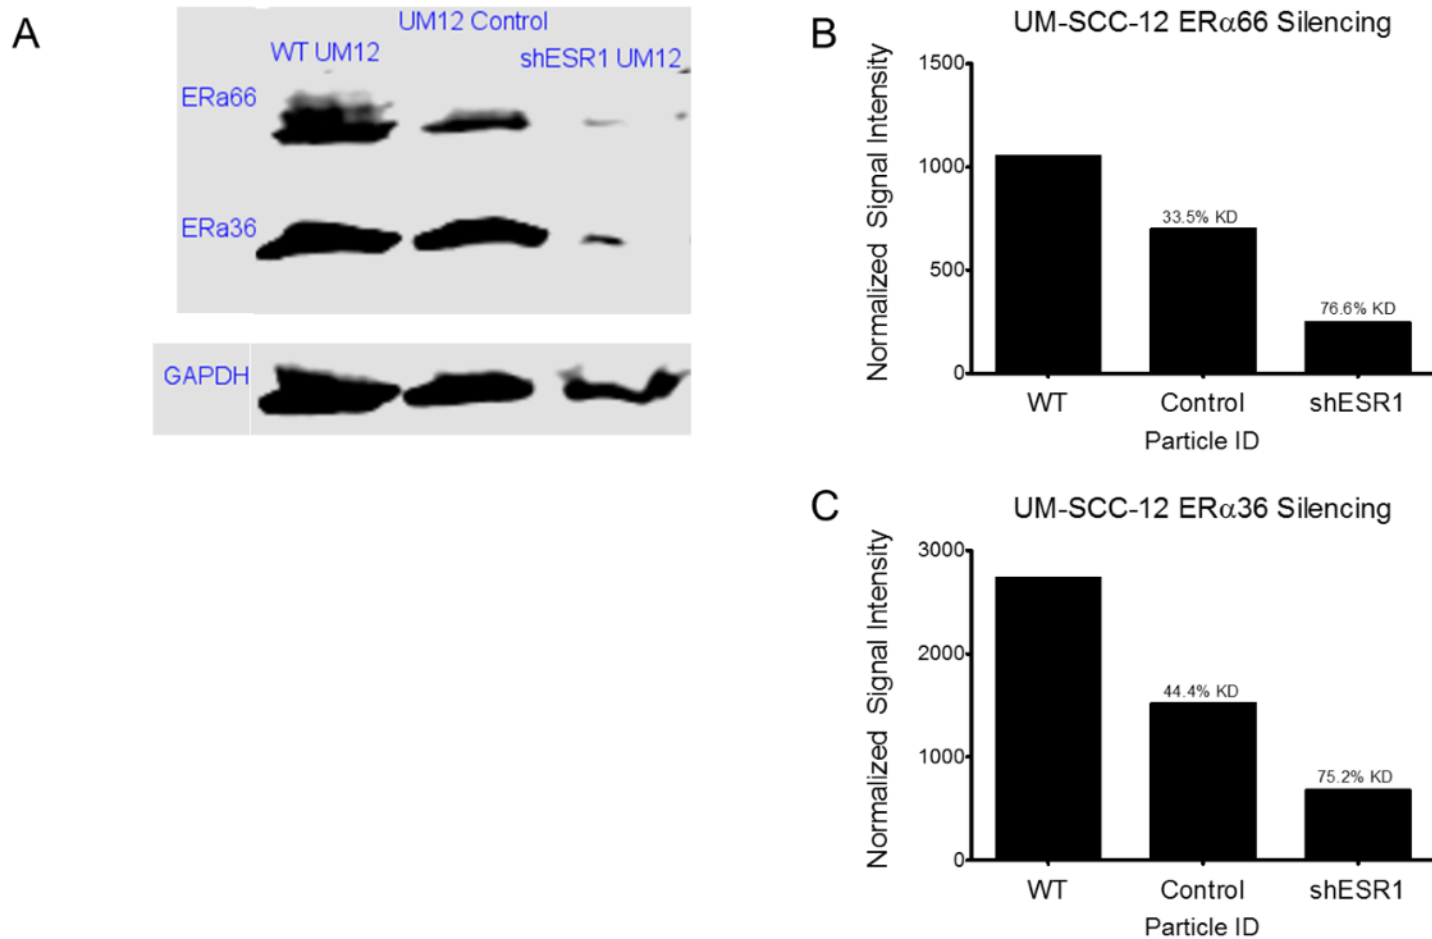

Supplemental Figure 3: A representative western blot (A) showing ER $\alpha$  expression in WT, scramble-control, and ESR1-silenced UM-SCC-12 cell lines. GAPDH was used as a protein loading control. ER $\alpha$ 66 (B) and ER $\alpha$ 36 (C) protein expression were normalized to GAPDH and quantified by normalized signal intensity. N=1.

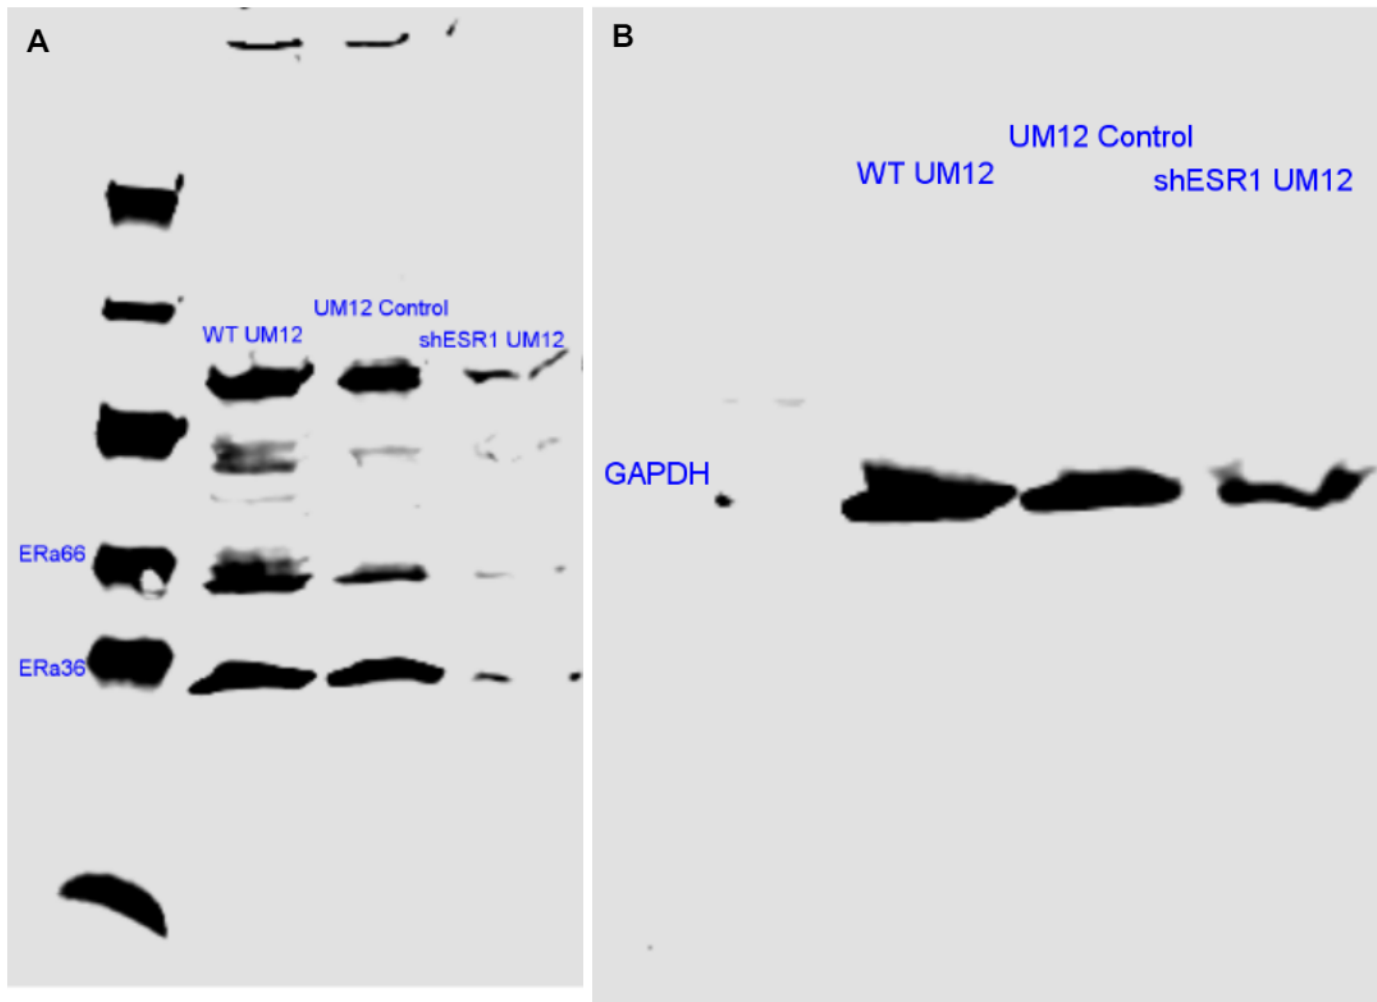

Supplemental Figure 4: Whole western blot of WT, scramble-control, and ESR1-silenced UM-SCC-12 cells probed with (A) an all-ER antibody and (B) a GAPDH antibody.

## Supplemental Tables

Table S1 Xenograft models of LSCC tumor growth curve: linear fit, weeks 2-8

|                                         | 11A Control     | 11A 17b-Estradiol | 12 Control       | 12 17b-Estradiol |
|-----------------------------------------|-----------------|-------------------|------------------|------------------|
| <b>Best-fit values</b>                  |                 |                   |                  |                  |
| Slope                                   | 346.1 ± 46.88   | 428.2 ± 47.74     | 63.91 ± 12.24    | 164.9 ± 19.50    |
| Y-intercept when X=0.0                  | -1091 ± 280.8   | -1254 ± 263.7     | 47.39 ± 65.68    | -352.4 ± 106.0   |
| X-intercept when Y=0.0                  | 3.152           | 2.929             | -0.7415          | 2.138            |
| 1/slope                                 | 0.002890        | 0.002335          | 0.01565          | 0.006065         |
| <b>95% Confidence Intervals</b>         |                 |                   |                  |                  |
| Slope                                   | 249.3 to 442.8  | 331.5 to 525.0    | 39.31 to 88.51   | 125.9 to 203.9   |
| Y-intercept when X=0.0                  | -1671 to -511.3 | -1789 to -719.8   | -84.66 to 179.4  | -564.6 to -140.3 |
| X-intercept when Y=0.0                  | 2.001 to 3.866  | 2.103 to 3.519    | -4.449 to 0.9814 | 1.085 to 2.844   |
| <b>Goodness of Fit</b>                  |                 |                   |                  |                  |
| R square                                | 0.6943          | 0.6850            | 0.3530           | 0.5478           |
| Sy.x                                    | 417.0           | 612.1             | 180.6            | 306.4            |
| <b>Is slope significantly non-zero?</b> |                 |                   |                  |                  |
| F                                       | 54.50           | 80.46             | 27.28            | 71.48            |
| DFn, DFd                                | 1.000, 24.00    | 1.000, 37.00      | 1.000, 50.00     | 1.000, 59.00     |
| P value                                 | < 0.0001        | < 0.0001          | < 0.0001         | < 0.0001         |
| Deviation from zero?                    | Significant     | Significant       | Significant      | Significant      |
| <b>Data</b>                             |                 |                   |                  |                  |
| Number of X values                      | 7               | 7                 | 7                | 7                |
| Maximum number of Y replicates          | 5               | 7                 | 8                | 9                |
| Total number of values                  | 26              | 39                | 52               | 61               |
| Number of missing values                | 44              | 31                | 18               | 9                |

Table S2 Xenograft models of LSCC tumor growth curve: exponential fit, weeks 2-8

| Exponential growth equation | 11A Control      | 11A 17b-Estradiol | 12 Control        | 12 17b-Estradiol |
|-----------------------------|------------------|-------------------|-------------------|------------------|
| Best-fit values             |                  |                   |                   |                  |
| Y0                          | 44.95            | 15.50             | 163.4             | 54.62            |
| k                           | 0.4723           | 0.6563            | 0.1533            | 0.3782           |
| Tau                         | 2.117            | 1.524             | 6.524             | 2.644            |
| Doubling Time               | 1.468            | 1.056             | 4.522             | 1.833            |
| Std. Error                  |                  |                   |                   |                  |
| Y0                          | 24.49            | 7.819             | 38.50             | 21.42            |
| k                           | 0.07290          | 0.06586           | 0.03665           | 0.05400          |
| 95% Confidence Intervals    |                  |                   |                   |                  |
| Y0                          | -5.601 to 95.49  | -0.3556 to 31.35  | 86.01 to 240.8    | 11.77 to 97.48   |
| k                           | 0.3218 to 0.6227 | 0.5228 to 0.7898  | 0.07960 to 0.2270 | 0.2701 to 0.4862 |
| Tau                         | 1.606 to 3.108   | 1.266 to 1.913    | 4.406 to 12.56    | 2.057 to 3.702   |
| Doubling Time               | 1.113 to 2.154   | 0.8776 to 1.326   | 3.054 to 8.708    | 1.426 to 2.566   |
| Goodness of Fit             |                  |                   |                   |                  |
| Degrees of Freedom          | 24               | 37                | 50                | 59               |
| R square                    | 0.7679           | 0.8778            | 0.3106            | 0.5898           |
| Absolute Sum of Squares     | 3.168e+006       | 5.376e+006        | 1.738e+006        | 5.025e+006       |
| Sy.x                        | 363.3            | 381.2             | 186.5             | 291.8            |
| Number of points            |                  |                   |                   |                  |
| Analyzed                    | 26               | 39                | 52                | 61               |

Table S3 Xenograft models of LSCC tumor growth curve: linear fit, weeks 4-8

|                                  | 11A Control     | 11A 17b-Estradiol | 12 Control           | 12 17b-Estradiol |
|----------------------------------|-----------------|-------------------|----------------------|------------------|
| Best-fit values                  |                 |                   |                      |                  |
| Slope                            | 441.2 ± 69.19   | 684.9 ± 79.54     | 19.09 ± 22.63        | 209.0 ± 37.80    |
| Y-intercept when X=0.0           | -1728 ± 443.0   | -2958 ± 503.3     | 343.3 ± 140.8        | -638.4 ± 234.5   |
| X-intercept when Y=0.0           | 3.917           | 4.318             | -17.99               | 3.055            |
| 1/slope                          | 0.002267        | 0.001460          | 0.05239              | 0.004785         |
| 95% Confidence Intervals         |                 |                   |                      |                  |
| Slope                            | 296.9 to 585.5  | 521.4 to 848.4    | -26.93 to 65.11      | 132.7 to 285.3   |
| Y-intercept when X=0.0           | -2653 to -804.3 | -3992 to -1923    | 56.95 to 629.7       | -1112 to -164.9  |
| X-intercept when Y=0.0           | 2.664 to 4.606  | 3.627 to 4.784    | -infinity to -0.8896 | 1.221 to 3.969   |
| Goodness of Fit                  |                 |                   |                      |                  |
| R square                         | 0.6703          | 0.7404            | 0.02050              | 0.4213           |
| Sy.x                             | 417.2           | 574.1             | 194.5                | 350.3            |
| Is slope significantly non-zero? |                 |                   |                      |                  |
| F                                | 40.66           | 74.15             | 0.7115               | 30.57            |
| DFn, DFd                         | 1.000, 20.00    | 1.000, 26.00      | 1.000, 34.00         | 1.000, 42.00     |
| P value                          | < 0.0001        | < 0.0001          | 0.4048               | < 0.0001         |
| Deviation from zero?             |                 |                   |                      |                  |
|                                  | Significant     | Significant       | Not Significant      | Significant      |
| Data                             |                 |                   |                      |                  |
| Number of X values               | 5               | 5                 | 5                    | 5                |
| Maximum number of Y replicates   | 5               | 7                 | 8                    | 9                |
| Total number of values           | 22              | 28                | 36                   | 44               |
| Number of missing values         | 28              | 22                | 14                   | 6                |
